# Supplementary material for: Single-molecule magnet achieved through topological tuning with sodium ions
Source: Royal Society of Chemistry journal article supplement (doi:10.1039/d1ce01382c), 2021-01-01
Supplement: d1ce01382c1.pdf [file d1ce01382c1.pdf]

## Single-molecular magnet achieved through topological tuning by sodium ion

Yanfang Wu,<sup>a</sup> Zhao-Bo Hu,<sup>\*,b,c</sup> Lixia Quan,<sup>d</sup> Leina Jing,<sup>c</sup> Jinlei Zhan<sup>e</sup> and Zilu Chen<sup>\*c</sup>

<sup>a</sup> School of Energy and Mechanical Engineering, Jiangxi University of Science and Technology, Nanchang 330013, China.

<sup>b</sup>Chaotic Matter Science Research Center, Faculty of Materials Metallurgy and Chemistry, Jiangxi University of Science and Technology, Ganzhou 341000, P. R. China.

<sup>c</sup>State Key Laboratory for Chemistry and Molecular Engineering of Medicinal Resources, School of Chemistry and Pharmaceutical Sciences, Guangxi Normal University, Guilin 541004, P. R. China.

<sup>d</sup>School of chemistry and Environmental Sciences, Shangrao Normal University, Shangrao 334001, P. R. China.

<sup>e</sup>Jiangsu Key Laboratory of Micro and Nano Heat Fluid Flow Technology and Energy Application, School of Physical Science and Technology, Suzhou University of Science and Technology, Suzhou, 215009, China

**Table S1.** Crystallographic data and structural refinement parameters for complexes **1-3**.

| Complex                                                            | <b>1</b>                                                                       | <b>2</b>                                                                                       | <b>3</b>                                                                                        |
|--------------------------------------------------------------------|--------------------------------------------------------------------------------|------------------------------------------------------------------------------------------------|-------------------------------------------------------------------------------------------------|
| Empirical Sormula                                                  | C <sub>38</sub> H <sub>39</sub> Mn <sub>3</sub> N <sub>8</sub> O <sub>24</sub> | C <sub>45</sub> H <sub>51</sub> Mn <sub>3</sub> N <sub>6</sub> Na <sub>2</sub> O <sub>21</sub> | C <sub>70</sub> H <sub>81</sub> Mn <sub>6</sub> N <sub>12</sub> Na <sub>3</sub> O <sub>47</sub> |
| Formula weight / g·mol <sup>-1</sup>                               | 1156.59                                                                        | 1222.71                                                                                        | 2241.07                                                                                         |
| Temperature / K                                                    | 153(2)                                                                         | 153(2) K                                                                                       | 153(2) K                                                                                        |
| Wavelength / Å                                                     | 0.71073                                                                        | 0.71073 Å                                                                                      | 0.71073 Å                                                                                       |
| Crystal system                                                     | Triclinic                                                                      | Triclinic                                                                                      | Trigonal                                                                                        |
| Space group                                                        | <i>P</i> $\bar{1}$                                                             | <i>P</i> $\bar{1}$                                                                             | <i>R</i> -3                                                                                     |
| <i>a</i> / Å                                                       | 11.6155(4)                                                                     | 13.5021(7)                                                                                     | 16.918(10)                                                                                      |
| <i>b</i> / Å                                                       | 13.4396(6)                                                                     | 14.1079(8)                                                                                     | 16.918(10)                                                                                      |
| <i>c</i> / Å                                                       | 16.6802(8)                                                                     | 15.3728(7)                                                                                     | 28.201(3)                                                                                       |
| $\alpha$ / °                                                       | 86.026(4)                                                                      | 84.810(4)                                                                                      | 90                                                                                              |
| $\beta$ / °                                                        | 75.057(3)                                                                      | 68.896(4)                                                                                      | 90                                                                                              |
| $\gamma$ / °                                                       | 85.102(5)                                                                      | 77.273(5)                                                                                      | 120                                                                                             |
| <i>V</i> / Å <sup>3</sup>                                          | 2503.64(19)                                                                    | 2664.6(2)                                                                                      | 7026.6(11)                                                                                      |
| <i>Z</i>                                                           | 2                                                                              | 2                                                                                              | 3                                                                                               |
| $\rho_{\text{calc}}$ / g cm <sup>-3</sup>                          | 1.534                                                                          | 1.524                                                                                          | 1.589                                                                                           |
| $\mu$ / mm <sup>-1</sup>                                           | 0.835                                                                          | 0.799                                                                                          | 0.900                                                                                           |
| $\theta$ range for data / °                                        | 3.438 to 28.794                                                                | 3.286 to 25.009                                                                                | 2.002 to 25.007                                                                                 |
| F(000)                                                             | 1180                                                                           | 1256                                                                                           | 3432                                                                                            |
| Crystal size / mm                                                  | 0.30 × 0.25 × 0.18                                                             | 0.24 × 0.19 × 0.16                                                                             | 0.28 × 0.23 × 0.18                                                                              |
| Reflections collected                                              | 26750                                                                          | 23836                                                                                          | 23530                                                                                           |
| Reflections unique                                                 | 11576                                                                          | 9216                                                                                           | 2710                                                                                            |
| <i>R</i> <sub>int</sub>                                            | 0.0586                                                                         | 0.0572                                                                                         | 0.0267                                                                                          |
| Max. / min. transmission                                           | 0.860 and 0.778                                                                | 0.880 and 0.833                                                                                | 0.850 and 0.780                                                                                 |
| Data / restraints / parameters                                     | 11576 / 71 / 686                                                               | 9216 / 119 / 731                                                                               | 2710 / 2 / 225                                                                                  |
| Goodness-of-fit                                                    | 1.079                                                                          | 1.139                                                                                          | 1.057                                                                                           |
| <i>R</i> <sub>1</sub> ( <i>I</i> > 2σ( <i>I</i> )) <sup>[a]</sup>  | 0.0920                                                                         | 0.0687                                                                                         | 0.0314                                                                                          |
| <i>wR</i> <sub>2</sub> ( <i>I</i> > 2σ( <i>I</i> )) <sup>[b]</sup> | 0.2347                                                                         | 0.1675                                                                                         | 0.0834                                                                                          |
| <i>R</i> <sub>1</sub> (all data) <sup>[a]</sup>                    | 0.1710                                                                         | 0.0895                                                                                         | 0.0355                                                                                          |
| <i>wR</i> <sub>2</sub> (all data) <sup>[b]</sup>                   | 0.2937                                                                         | 0.1847                                                                                         | 0.0881                                                                                          |
| Largest diff. Peak, hole / (e Å <sup>-3</sup> )                    | 0.989 and -0.464                                                               | 1.863 and -1.329                                                                               | 0.493 and -0.671                                                                                |

<sup>[a]</sup> $R_1 = \sum ||F_o| - |F_c|| / \sum |F_o|$ ; <sup>[b]</sup> $wR_2 = [\sum w(F_o^2 - F_c^2)^2 / \sum w(F_o^2)^2]^{1/2}$ .

**Table S2.** Bond lengths [Å] and angles [°] for **1**.

|             |            |                |            |
|-------------|------------|----------------|------------|
| Mn1-O1      | 1.857(4)   | Mn2-N4         | 2.018(5)   |
| Mn1-O3      | 1.901(4)   | Mn2-O13        | 2.208(4)   |
| Mn1-O10     | 1.936(4)   | Mn2-O15        | 2.283(5)   |
| Mn1-N2      | 2.019(5)   | Mn2-Mn3        | 3.1862(13) |
| Mn1-O12     | 2.248(4)   | Mn3-O1         | 1.884(4)   |
| Mn1-O11     | 2.250(4)   | Mn3-O9         | 1.906(4)   |
| Mn1-Mn2     | 3.2393(13) | Mn3-O7         | 1.940(5)   |
| Mn2-O6      | 1.889(4)   | Mn3-N6         | 2.027(5)   |
| Mn2-O1      | 1.899(4)   | Mn3-O14        | 2.145(4)   |
| Mn2-O4      | 1.929(4)   | Mn3-O16        | 2.325(6)   |
|             |            |                |            |
| O1-Mn1-O3   | 172.07(19) | O4-Mn2-O13     | 97.17(18)  |
| O1-Mn1-O10  | 92.84(17)  | N4-Mn2-O13     | 85.37(18)  |
| O3-Mn1-O10  | 86.28(18)  | O6-Mn2-O15     | 89.1(2)    |
| O1-Mn1-N2   | 90.10(18)  | O1-Mn2-O15     | 91.6(2)    |
| O3-Mn1-N2   | 91.64(18)  | O4-Mn2-O15     | 92.4(2)    |
| O10-Mn1-N2  | 173.2(2)   | N4-Mn2-O15     | 85.1(2)    |
| O1-Mn1-O12  | 85.49(17)  | O13-Mn2-O15    | 170.40(17) |
| O3-Mn1-O12  | 86.77(18)  | O1-Mn3-O9      | 179.4(2)   |
| O10-Mn1-O12 | 96.30(17)  | O1-Mn3-O7      | 93.30(17)  |
| N2-Mn1-O12  | 90.03(18)  | O9-Mn3-O7      | 86.7(2)    |
| O1-Mn1-O11  | 101.14(16) | O1-Mn3-N6      | 88.42(18)  |
| O3-Mn1-O11  | 86.71(17)  | O9-Mn3-N6      | 91.5(2)    |
| O10-Mn1-O11 | 87.71(17)  | O7-Mn3-N6      | 172.3(2)   |
| N2-Mn1-O11  | 85.72(18)  | O1-Mn3-O14     | 89.07(16)  |
| O12-Mn1-O11 | 172.11(15) | O9-Mn3-O14     | 91.51(19)  |
| O6-Mn2-O1   | 176.97(17) | O7-Mn3-O14     | 92.59(18)  |
| O6-Mn2-O4   | 85.14(18)  | N6-Mn3-O14     | 94.99(19)  |
| O1-Mn2-O4   | 91.88(17)  | O1-Mn3-O16     | 91.1(2)    |
| O6-Mn2-N4   | 92.2(2)    | O9-Mn3-O16     | 88.3(3)    |
| O1-Mn2-N4   | 90.84(19)  | O7-Mn3-O16     | 89.6(2)    |
| O4-Mn2-N4   | 176.4(2)   | N6-Mn3-O16     | 82.8(2)    |
| O6-Mn2-O13  | 92.46(19)  | O14-Mn3-O16    | 177.8(2)   |
| O1-Mn2-O13  | 87.37(17)  |                |            |
|             |            |                |            |
| Mn1-O1-Mn3  | 120.7(2)   | Mn3-O7-N4-Mn2  | 28.5(5)    |
| Mn1-O1-Mn2  | 119.18(19) | Mn1-O10-N6-Mn3 | -1.8(5)    |
| Mn3-O1-Mn2  | 114.8(2)   | Mn2-O4-N2-Mn1  | 2.7(6)     |

**Table S3** Bond lengths [Å] and angles [°] for **2**.

|         |          |          |          |
|---------|----------|----------|----------|
| Mn1-O1  | 1.876(3) | Mn3-O15  | 2.191(3) |
| Mn1-O3  | 1.907(3) | Na1-O17A | 2.322(4) |
| Mn1-O16 | 1.998(3) | Na1-O17  | 2.322(4) |
| Mn1-N2  | 2.034(4) | Na1-O16A | 2.422(3) |

|         |            |          |           |
|---------|------------|----------|-----------|
| Mn1-O10 | 2.127(3)   | Na1-O16  | 2.422(3)  |
| Mn1-O11 | 2.224(3)   | Na1-O3A  | 2.489(3)  |
| Mn1-Mn3 | 3.1979(9)  | Na1-O3   | 2.489(3)  |
| Mn1-Mn2 | 3.2322(10) | Na2-O18  | 2.316(4)  |
| Mn2-O1  | 1.883(3)   | Na2-O18B | 2.316(4)  |
| Mn2-O6  | 1.892(3)   | Na2-O6   | 2.435(3)  |
| Mn2-O12 | 2.017(3)   | Na2-O6B  | 2.435(3)  |
| Mn2-N4  | 2.051(4)   | Na2-O12B | 2.624(3)  |
| Mn2-O4  | 2.134(3)   | Na2-O12  | 2.624(3)  |
| Mn2-O13 | 2.237(3)   | Na3-O191 | 2.141(10) |
| Mn2-Mn3 | 3.2221(10) | Na3-O15  | 2.392(4)  |
| Mn3-O1  | 1.863(3)   | Na3-O8C  | 2.467(5)  |
| Mn3-O9  | 1.910(3)   | Na3-O9   | 2.549(5)  |
| Mn3-O14 | 2.014(3)   | Na3-O14  | 2.706(5)  |
| Mn3-N6  | 2.053(4)   | Na3-O192 | 2.779(12) |
| Mn3-O7  | 2.083(4)   | Na3-O20  | 2.838(13) |

|             |            |                |            |
|-------------|------------|----------------|------------|
| O1-Mn1-O3   | 177.63(14) | O12-Mn2-O13    | 88.78(13)  |
| O1-Mn1-O16  | 95.00(13)  | N4-Mn2-O13     | 83.90(14)  |
| O3-Mn1-O16  | 84.34(13)  | O4-Mn2-O13     | 174.84(13) |
| O1-Mn1-N2   | 89.67(14)  | O1-Mn3-O9      | 178.92(15) |
| O3-Mn1-N2   | 91.14(14)  | O1-Mn3-O14     | 94.39(14)  |
| O16-Mn1-N2  | 174.16(14) | O9-Mn3-O14     | 84.92(14)  |
| O1-Mn1-O10  | 88.67(13)  | O1-Mn3-N6      | 89.60(14)  |
| O3-Mn1-O10  | 89.11(13)  | O9-Mn3-N6      | 90.96(15)  |
| O16-Mn1-O10 | 94.31(14)  | O14-Mn3-N6     | 170.69(16) |
| N2-Mn1-O10  | 89.30(14)  | O1-Mn3-O7      | 89.69(14)  |
| O1-Mn1-O11  | 88.99(13)  | O9-Mn3-O7      | 91.17(14)  |
| O3-Mn1-O11  | 93.26(13)  | O14-Mn3-O7     | 92.91(15)  |
| O16-Mn1-O11 | 89.13(13)  | N6-Mn3-O7      | 95.52(15)  |
| N2-Mn1-O11  | 87.43(14)  | O1-Mn3-O15     | 90.14(13)  |
| O10-Mn1-O11 | 176.00(13) | O9-Mn3-O15     | 88.97(14)  |
| O1-Mn2-O6   | 177.86(14) | O14-Mn3-O15    | 83.54(14)  |
| O1-Mn2-O12  | 96.23(14)  | N6-Mn3-O15     | 88.05(14)  |
| O6-Mn2-O12  | 83.70(14)  | O7-Mn3-O15     | 176.42(14) |
| O1-Mn2-N4   | 89.79(15)  | Mn3-Mn1-Mn2    | 60.14(2)   |
| O6-Mn2-N4   | 90.58(16)  | Mn3-Mn2-Mn1    | 59.40(2)   |
| O12-Mn2-N4  | 170.30(15) | Mn1-Mn3-Mn2    | 60.46(2)   |
| O1-Mn2-O4   | 87.85(13)  | Mn3-O1-Mn1     | 117.56(16) |
| O6-Mn2-O4   | 90.00(14)  | Mn3-O1-Mn2     | 118.65(15) |
| O12-Mn2-O4  | 90.27(13)  | Mn1-O1-Mn2     | 118.59(16) |
| N4-Mn2-O4   | 97.58(14)  | Mn2-O4-N2-Mn1  | 0.6(4)     |
| O1-Mn2-O13  | 87.21(13)  | Mn3-O7-N4-Mn2  | 6.7(4)     |
| O6-Mn2-O13  | 94.93(14)  | Mn1-O10-N6-Mn3 | 8.3(4)     |

---

Symmetry codes: A)  $-x + 1, -y + 1, -z + 2$ ; B)  $-x + 2, -y, -z + 2$ ; C)  $-x + 2, -y + 1, -z + 1$

**Table S4** Bond lengths [ $\text{\AA}$ ] and angles [ $^\circ$ ] for **3**.

|            |            |                |            |
|------------|------------|----------------|------------|
| Mn1-O1     | 1.8884(5)  | Na1-O7         | 2.3098(17) |
| Mn1-O3     | 1.9219(14) | Na1-O7C        | 2.3098(17) |
| Mn1-O5     | 1.9932(14) | Na1-O3         | 2.4463(14) |
| Mn1-N2     | 2.0179(17) | Na1-O3C        | 2.4464(14) |
| Mn1-O4A    | 2.1261(14) | Na1-O5C        | 2.4990(14) |
| Mn1-O6B    | 2.2205(14) | Na1-O5         | 2.4991(14) |
| Mn1-Mn1B   | 3.2315(5)  | Mn1-Mn1A       | 3.2315(5)  |
| O1-Mn1-O3  | 177.79(7)  | O1-Mn1-O6B     | 86.83(6)   |
| O1-Mn1-O5  | 95.25(7)   | O3-Mn1-O6B     | 95.34(6)   |
| O3-Mn1-O5  | 85.24(6)   | O5-Mn1-O6B     | 87.52(6)   |
| O1-Mn1-N2  | 89.47(7)   | N2-Mn1-O6B     | 88.35(6)   |
| O3-Mn1-N2  | 90.22(6)   | O4A-Mn1-O6B    | 175.62(5)  |
| O5-Mn1-N2  | 173.55(6)  | Mn1B-Mn1-Mn1A  | 60.0       |
| O1-Mn1-O4A | 88.88(6)   | Mn1B-O1-Mn1A   | 117.66(4)  |
| O3-Mn1-O4A | 88.94(6)   | Mn1B-O1-Mn1    | 117.66(4)  |
| O5-Mn1-O4A | 93.75(6)   | Mn1A-O1-Mn1    | 117.66(4)  |
| N2-Mn1-O4A | 90.74(6)   | Mn1B-O4-N2-Mn1 | -6.52(17)  |

Symmetry codes: A)  $-y + 1, x - y, z$ ; B)  $-x + y + 1, -x + 1, z$ ; C)  $-x + 1, -y + 1, -z$ .

**Table S5** Hydrogen bonds for **1-3** [ $\text{\AA}$  and  $^\circ$ ].

| complex         | D-H $\cdots$ A  | d(D-H) | d(H $\cdots$ A) | d(D $\cdots$ A) | $\angle$ (DHA) |
|-----------------|-----------------|--------|-----------------|-----------------|----------------|
| <b>1</b>        | O11-H111...O13  | 0.86   | 2.43            | 3.106(6)        | 136.0          |
|                 | O11-H112...O18  | 0.84   | 2.62            | 3.335(7)        | 144.5          |
|                 | O11-H112...N7   | 0.84   | 2.20            | 2.919(7)        | 143.3          |
|                 | O12-H121...O3A  | 0.80   | 2.06            | 2.697(6)        | 136.7          |
|                 | O12-H122...N1A  | 0.87   | 2.58            | 3.203(8)        | 129.6          |
|                 | C29-H29B...O17B | 0.98   | 2.63            | 3.459(8)        | 142.8          |
|                 | O15-H151...O22  | 0.83   | 2.41            | 2.887(10)       | 116.7          |
|                 | O16-H161...O22  | 0.84   | 2.05            | 2.738(12)       | 139.1          |
|                 | O16-H162...O2WC | 0.84   | 2.29            | 3.09(2)         | 160.5          |
|                 | O17-H171...O13  | 0.82   | 1.83            | 2.591(5)        | 154.4          |
|                 | O19-H19A...O1W  | 0.84   | 1.86            | 2.699(18)       | 176.7          |
|                 | O20-H201...O21D | 0.87   | 2.15            | 2.802(10)       | 131.4          |
|                 | O20-H202...O18E | 0.85   | 2.50            | 3.350(10)       | 178.3          |
|                 | O21-H211...O26F | 0.83   | 2.22            | 2.70(2)         | 116.3          |
|                 | O21-H212...O5   | 0.85   | 1.92            | 2.718(8)        | 155.1          |
|                 | O22-H221...O23  | 0.85   | 1.83            | 2.665(15)       | 165.1          |
|                 | O22-H222...O21F | 0.85   | 1.81            | 2.658(11)       | 173.7          |
|                 | O23-H231...N8G  | 0.84   | 2.21            | 2.978(17)       | 150.4          |
|                 | O23-H232...O18G | 0.86   | 2.55            | 3.167(12)       | 130.0          |
|                 | O23-H232...O2W  | 0.86   | 2.22            | 2.87(3)         | 132.0          |
| O26-H261...O27H | 0.85            | 1.79   | 2.35(3)         | 121.5           |                |
| O26-H261...O27A | 0.85            | 2.12   | 2.77(4)         | 134.6           |                |

|          |                                                                                                                                                                                                                                                                 |      |      |           |       |
|----------|-----------------------------------------------------------------------------------------------------------------------------------------------------------------------------------------------------------------------------------------------------------------|------|------|-----------|-------|
|          | O26-H262...O16                                                                                                                                                                                                                                                  | 0.85 | 2.50 | 3.349(18) | 175.9 |
|          | O27-H271...O2                                                                                                                                                                                                                                                   | 0.84 | 2.05 | 2.80(2)   | 148.5 |
|          | O27-H272...O1W                                                                                                                                                                                                                                                  | 0.85 | 1.95 | 2.80(3)   | 177.2 |
|          | O1W-H1WB...O9I                                                                                                                                                                                                                                                  | 0.90 | 2.30 | 2.863(8)  | 120.9 |
|          | O1W-H1WA...O26I                                                                                                                                                                                                                                                 | 0.90 | 2.09 | 2.55(3)   | 110.4 |
|          | O1W-H1WB...O9I                                                                                                                                                                                                                                                  | 0.90 | 2.30 | 2.863(8)  | 120.9 |
|          | O1W-H1WB...N5I                                                                                                                                                                                                                                                  | 0.90 | 2.43 | 3.076(14) | 129.7 |
|          | O2W-H2WA...N1G                                                                                                                                                                                                                                                  | 0.90 | 2.29 | 2.903(9)  | 124.9 |
|          | O2W-H2WA...O16C                                                                                                                                                                                                                                                 | 0.90 | 2.43 | 3.09(2)   | 129.8 |
|          | O2W-H2WA...N1G                                                                                                                                                                                                                                                  | 0.90 | 2.29 | 2.903(9)  | 124.9 |
|          | O2W-H2WB...O20J                                                                                                                                                                                                                                                 | 0.91 | 2.10 | 2.70(3)   | 122.9 |
|          | Symmetry codes: A) $-x + 1, -y + 1, -z$ ; B) $-x + 1, -y + 1, -z + 1$ ; C) $-x + 1, -y, -z$ ; D) $x + 1, y, z - 1$ ; E) $-x + 2, -y + 1, -z$ ; F) $-x + 1, -y, -z + 1$ ; G) $x, y - 1, z$ ; H) $x + 1, y - 1, z$ ; I) $x - 1, y + 1, z$ ; J) $-x + 2, -y, -z$ . |      |      |           |       |
| <b>2</b> | O17-H17A...O11A                                                                                                                                                                                                                                                 | 0.85 | 2.00 | 2.815(5)  | 160.8 |
|          | O18-H18A...O13B                                                                                                                                                                                                                                                 | 0.84 | 2.01 | 2.841(5)  | 170.3 |
|          | O18-H18B...O2D                                                                                                                                                                                                                                                  | 0.84 | 2.31 | 2.865(5)  | 124.4 |
|          | O191-H191...O5E                                                                                                                                                                                                                                                 | 0.86 | 2.44 | 3.212(13) | 148.8 |
|          | O191-H191...O8C                                                                                                                                                                                                                                                 | 0.86 | 2.50 | 3.046(12) | 121.5 |
|          | Symmetry codes: A) $-x + 1, -y + 1, -z + 2$ ; B) $-x + 2, -y, -z + 2$ ; C) $-x + 2, -y + 1, -z + 1$ ; D) $-x + 1, -y, -z + 2$ ; E) $x, y + 1, z$ .                                                                                                              |      |      |           |       |
| <b>3</b> | O1-H1...O9                                                                                                                                                                                                                                                      | 0.86 | 2.57 | 3.427(10) | 180.0 |
|          | O7-H71...O2E                                                                                                                                                                                                                                                    | 0.85 | 2.05 | 2.888(2)  | 173.0 |
|          | O8-H81...N1F                                                                                                                                                                                                                                                    | 0.85 | 2.59 | 3.135(4)  | 123.2 |
|          | O8-H82...O8F                                                                                                                                                                                                                                                    | 0.85 | 2.34 | 3.193(4)  | 173.9 |
|          | O11-H11...O11G                                                                                                                                                                                                                                                  | 0.86 | 1.61 | 2.44(4)   | 159.8 |
|          | O11-H11...O11D                                                                                                                                                                                                                                                  | 0.86 | 1.10 | 1.70(3)   | 119.7 |
|          | Symmetry codes: D) $x - y + 1/3, x - 1/3, -z + 2/3$ ; E) $y - 1/3, -x + y + 1/3, -z + 1/3$ ; F) $x - y + 2/3, x + 1/3, -z + 1/3$ ; G) $-x + 4/3, -y + 2/3, -z + 2/3$ .                                                                                          |      |      |           |       |

**Table S6**  $\pi$ - $\pi$  stacking interactions in **1** and **2** (Å)

| Complex  | ring(1)⋯ring(2)            | d[Cg(1)⋯Cg(2)] <sup>1</sup> | $\alpha^2$ | $\beta^3$ | $\gamma^4$ | d[Cg(1)⋯P(2)] <sup>5</sup> | d[Cg(2)⋯P(1)] <sup>6</sup> |
|----------|----------------------------|-----------------------------|------------|-----------|------------|----------------------------|----------------------------|
| <b>1</b> | C1 ~ C5...C22 ~ C27        | 3.4125(2)                   | 6          | 9.5       | 11         | -3.349                     | -3.366                     |
|          | C1 ~ C5...C30 ~ C34        | 3.8243(2)                   | 8          | 26        | 34         | -3.175                     | 3.4496                     |
|          | C10 ~ C14...C13 ~ C18      | 3.4067(2)                   | 3          | 13        | 14         | -3.301                     | -3.324                     |
|          | C19 ~ C23...C22 ~ C27      | 3.3449(2)                   | 0          | 4.2       | 4.3        | 3.3354                     | 3.336                      |
|          | C4 ~ C9...C30 ~ C34        | 3.5166(2)                   | 7          | 13        | 11         | -3.451                     | 3.4296                     |
|          | C13 ~ C18...C10 ~ C14      | 3.4067(2)                   | 3          | 14        | 13         | -3.324                     | -3.301                     |
|          | C13 ~ C18...C13 ~ C15      | 3.7291(2)                   | 0          | 26        | 26         | -3.34                      | -3.34                      |
|          | C13 ~ C18...C30 ~ C34      | 3.5462(2)                   | 7          | 20        | 12         | 3.463                      | 3.3433                     |
|          | C13 ~ C18...C33 ~ C38      | 3.7248(2)                   | 6          | 16        | 22         | 3.4641                     | 3.5862                     |
|          | C22 ~ C27...C22 ~ C27      | 3.8808(2)                   | 0          | 31        | 31         | 3.3362                     | 3.3362                     |
| <b>2</b> | C1 ~ C4,C9...C4 ~ C9       | 3.4014(2)                   | 3          | 7.1       | 9.4        | -3.356                     | -3.376                     |
|          | C10 ~ C13, C18...C13 ~ C18 | 3.8007(2)                   | 1          | 26        | 27         | 3.3979                     | 3.4166                     |
|          | C4 ~ C9...C4 ~ C9          | 3.7816(2)                   | 0          | 26        | 26         | -3.393                     | -3.393                     |
|          | C13 ~ C18...C13 ~ C18      | 3.8555(2)                   | 0          | 28        | 28         | 3.4046                     | 3.4046                     |
|          | C22 ~ C27...C22 ~ C27      | 3.8090(2)                   | 0          | 25        | 25         | -3.443                     | -3.443                     |

<sup>1</sup>Centroid–centroid distance. <sup>2</sup>Dihedral angle between the ring planes. <sup>3</sup>Angle between the centroid vector Cg(1)⋯Cg(2) and the normal to the plane 2. <sup>4</sup>Angle between the centroid vector Cg(1)⋯Cg(2) and the normal to the plane 1. <sup>5</sup>Perpendicular distance of Cg(1) on ring plane 2. <sup>6</sup>Perpendicular distance of Cg(2) on ring plane 1.

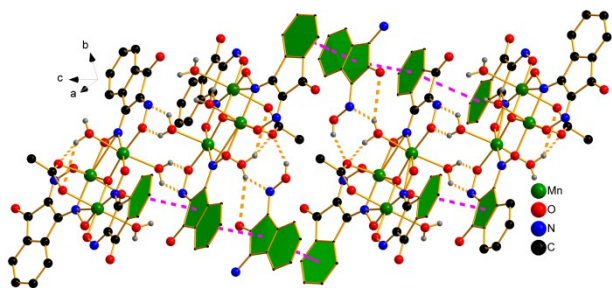

**Fig. S1** A show of the hydrogen bonds and  $\pi \cdots \pi$  stacking interactions in the supramolecular one-dimensional chain of **1**.

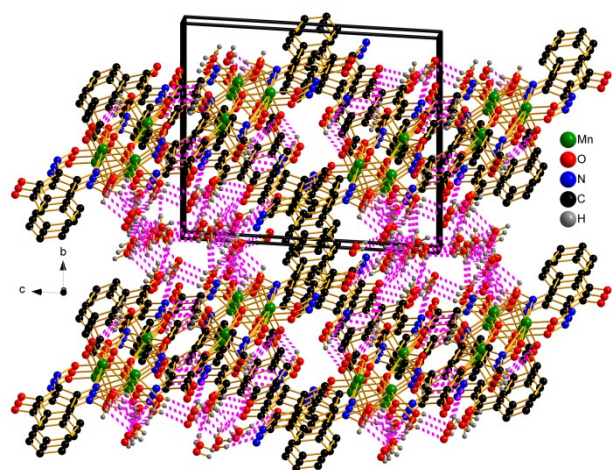

**Fig. S2** A show of the hydrogen bonds and  $\pi \cdots \pi$  stacking interactions in the supramolecular three-dimensional of **1**.

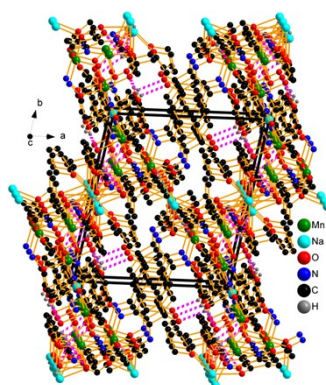

**Fig. S3** A show of the hydrogen bonds and  $\pi \cdots \pi$  stacking interactions in the supramolecular three-dimensional of **2**.



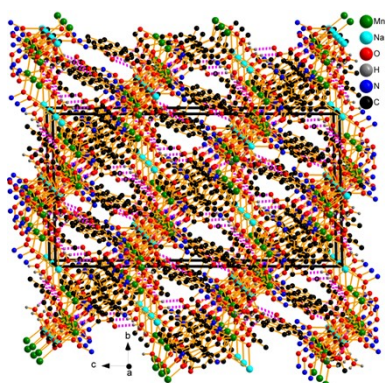

Fig. S4 A show of the hydrogen bonds stacking interactions in the supramolecular three-dimensional of **3**.

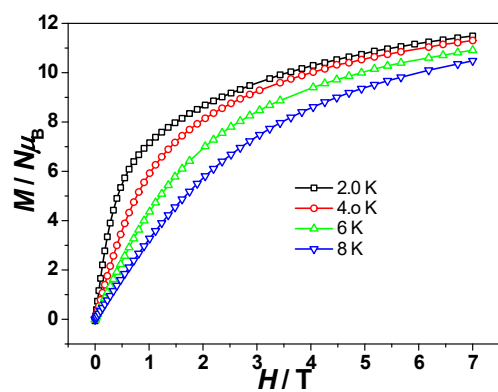

Fig. S5 Experimental  $M$  vs.  $H$  plots at the indicated temperatures for **3**.

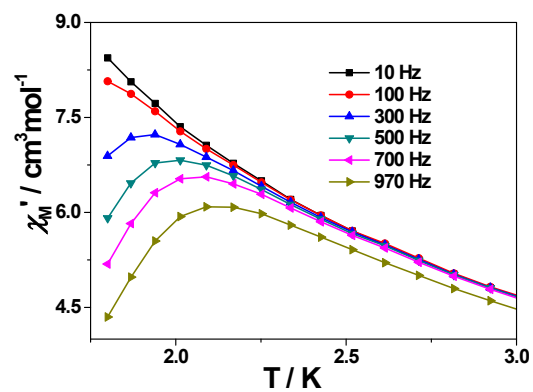

Fig. S6 Temperature-dependent  $\chi_M'$  AC susceptibilities under zero DC field for **3**.

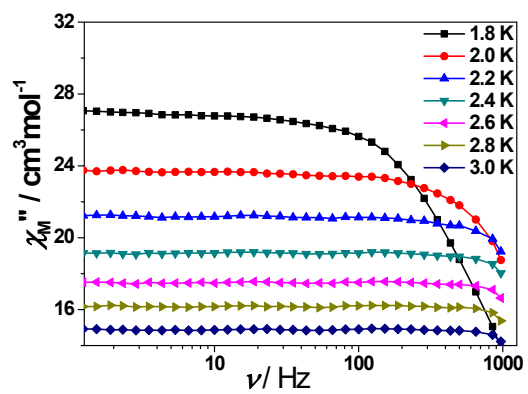

Fig. S7 Frequency-dependent  $\chi_M''$  AC susceptibilities under zero DC field for **3**.
